# Supplementary material for: Screening of Tyrosinase, Xanthine Oxidase, and α-Glucosidase Inhibitors from Polygoni Cuspidati Rhizoma et Radix by Ultrafiltration and HPLC Analysis
Source: MDPI journal article supplement (doi:10.3390/molecules28104170), 2023-05-18
Supplement: s1 [file s1]

**1,6-di-O-galloyl-D-glucose**

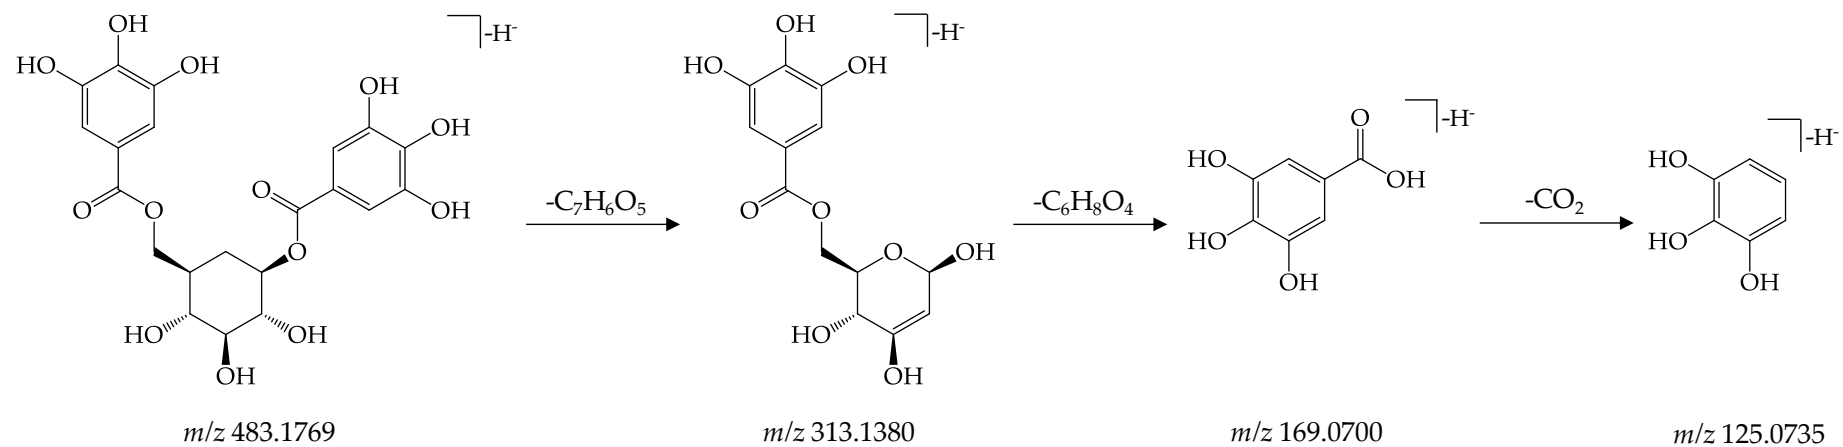

**polydatin**

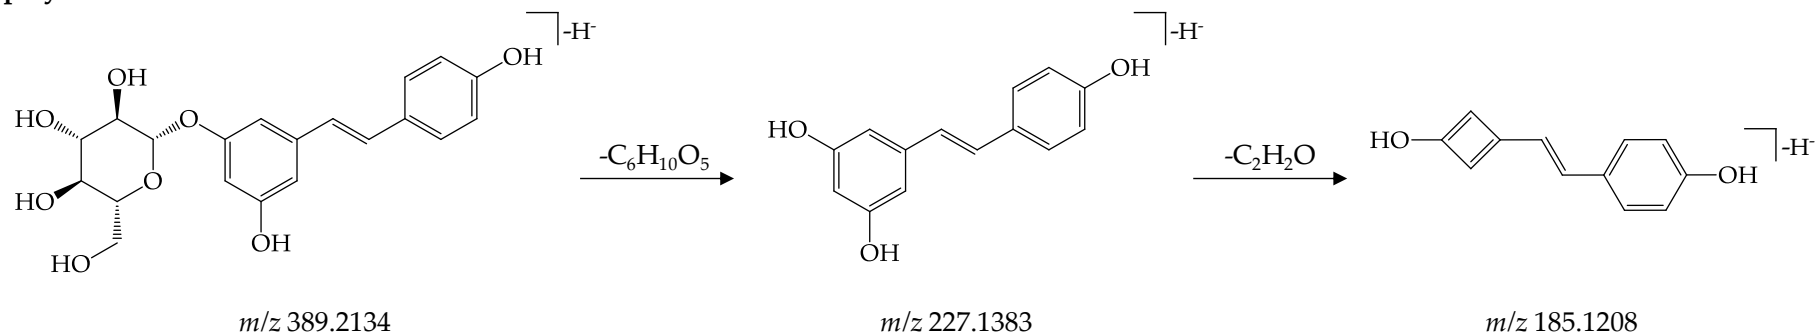

**Figure S1** Fragmentation pathway of 1,6-di-O-galloyl-D-glucose and polydatin

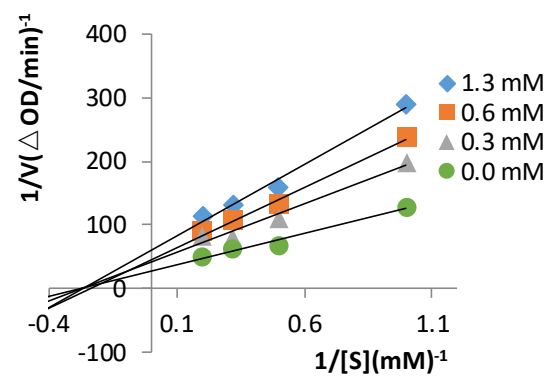

Methylgallate-TYR

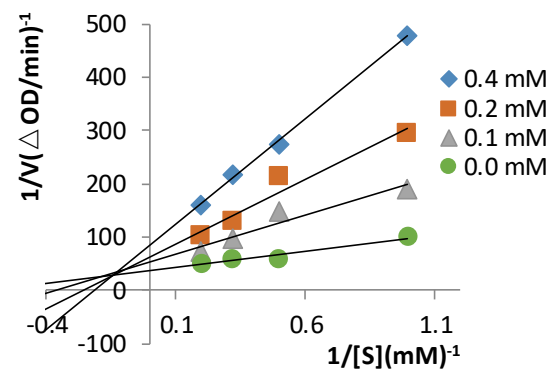

Polydatin-TYR

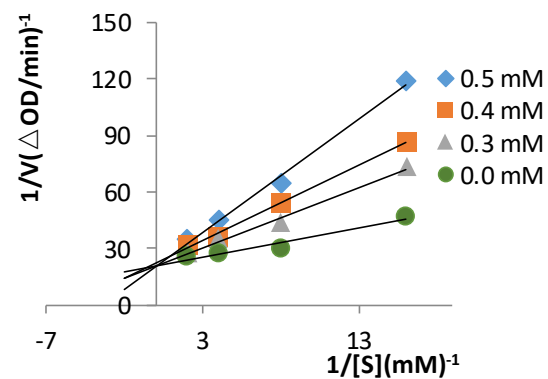

Polydatin-XOD

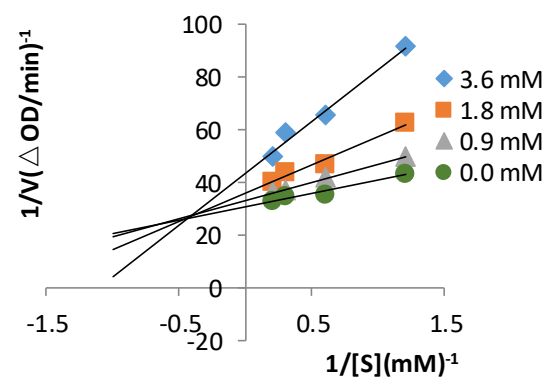

Polydatin- $\alpha$ -GLU

**Figure S2** Lineweaver-Burk plots of methylgallate and polydatin on the activity of three enzymes.
